# Supplementary material for: Genomic variation in two gametocyte non-producing Plasmodium falciparum clonal lines
Source: Malar J. 2016 Apr 21;15:229. doi: 10.1186/s12936-016-1254-1 (PMC4839107; doi:10.1186/s12936-016-1254-1)
Supplement: Supplementary file 1 — 10.1186/s12936-016-1254-1 SNPs identified in the three lines 3D7A, A4 and F12. [file 12936_2016_1254_MOESM1_ESM.xlsx]

## Sheet: S1 table 
	S1 table
	SNPs identified in the three lines 3D7A, A4 and F12
	Chr	Position	3D7 (reference)	F12	3D7A	A4	Gene	Subtelomeric	Clone	Amino acid change	Product description
	1	160654	A	T	T	T	.	No	F12/3D7A/A4	.
	1	160658	G	T	T	T	.	No	F12/3D7A/A4	.
	1	160662	G	T	T	T	.	No	F12/3D7A/A4	.
	1	228041	A	G	G	G	.	No	F12/3D7A/A4	.
	1	292816	T	C	C	C	.	No	F12/3D7A/A4	.
	1	314519	C	T	T	T	.	No	F12/3D7A/A4	.
	1	417149	A	T	T	T	.	No	F12/3D7A/A4	.
	1	417156	G	T	T	T	.	No	F12/3D7A/A4	.
	1	417162	G	T	T	T	.	No	F12/3D7A/A4	.
	1	519760	T	T	T	A	.	No	A4	.
	3	8228	G	G	G	A	.	Yes	A4	.
	3	8236	G	G	G	A	.	Yes	A4	.
	3	8578	C	C	C	G	.	Yes	A4	.
	3	8579	G	G	G	C	.	Yes	A4	.
	3	8635	T	T	T	A	.	Yes	A4	.
	3	8739	C	C	C	T	.	Yes	A4	.
	3	8742	C	C	C	A	.	Yes	A4	.
	3	8744	A	A	A	T	.	Yes	A4	.
	3	11399	T	T	T	C	.	Yes	A4	.
	3	11812	C	C	C	T	.	Yes	A4	.
	3	11871	A	A	A	T	.	Yes	A4	.
	3	11885	A	A	A	G	.	Yes	A4	.
	3	19695	T	T	T	C	.	Yes	A4	.
	3	19700	T	T	T	G	.	Yes	A4	.
	3	22770	T	T	T	G	.	Yes	A4	.
	3	22799	C	C	C	T	.	Yes	A4	.
	3	60645	C	T	T	T	.	Yes	F12/3D7A/A4	.
	3	104303	A	A	A	C	.	No	A4	.
	3	352725	T	A	A	A	.	No	F12/3D7A/A4	.
	3	352751	C	T	T	T	.	No	F12/3D7A/A4	.
	3	352757	C	T	T	T	.	No	F12/3D7A/A4	.
	3	395420	T	A	A	A	.	No	F12/3D7A/A4	.
	3	614336	C	A	A	A	.	No	F12/3D7A/A4	.
	4	197037	A	T	T	T	.	No	F12/3D7A/A4	.
	4	197041	A	T	T	T	.	No	F12/3D7A/A4	.
	4	340725	T	C	C	C	PF3D7_0406500	No	F12/3D7A/A4	Syn
	4	1182160	A	G	G	G	.	Yes	F12/3D7A/A4	.
	6	288212	T	A	A	A	.	No	F12/3D7A/A4	.
	6	288214	G	A	A	A	.	No	F12/3D7A/A4	.
	6	288218	C	A	A	A	.	No	F12/3D7A/A4	.
	6	1417087	G	T	T	T	.	Yes	F12/3D7A/A4	.
	6	1417739	C	G	G	G	.	Yes	F12/3D7A/A4	.
	7	251445	T	A	A	A	.	No	F12/3D7A/A4	.
	7	251447	T	A	A	A	.	No	F12/3D7A/A4	.
	7	251451	T	A	A	A	.	No	F12/3D7A/A4	.
	7	251453	T	A	A	A	.	No	F12/3D7A/A4	.
	7	251455	T	A	A	A	.	No	F12/3D7A/A4	.
	7	1297225	C	A	A	A	.	No	F12/3D7A/A4	.
	8	64348	C	A	A	A	.	No	F12/3D7A/A4	.
	8	73315	G	T	T	T	.	No	F12/3D7A/A4	.
	8	73317	G	T	T	T	.	No	F12/3D7A/A4	.
	8	604719	C	A	A	A	.	No	F12/3D7A/A4	.
	8	604721	C	A	A	A	.	No	F12/3D7A/A4	.
	8	630835	C	A	A	A	.	No	F12/3D7A/A4	.
	8	630841	T	A	A	A	.	No	F12/3D7A/A4	.
	8	630843	T	A	A	A	.	No	F12/3D7A/A4	.
	8	732643	T	A	A	A	.	No	F12/3D7A/A4	.
	8	732656	T	A	A	A	.	No	F12/3D7A/A4	.
	8	791570	A	A	A	G	.	No	A4	.
	8	816645	C	A	A	A	.	No	F12/3D7A/A4	.
	8	826359	G	T	T	T	PF3D7_0818100	No	F12/3D7A/A4	Intron	zinc finger protein, putative
	8	841204	A	T	T	T	.	No	F12/3D7A/A4	.
	8	841212	A	T	T	T	.	No	F12/3D7A/A4	.
	8	841214	A	T	T	T	.	No	F12/3D7A/A4	.
	8	841219	C	A	A	A	.	No	F12/3D7A/A4	.
	8	841238	A	T	T	T	.	No	F12/3D7A/A4	.
	8	857209	G	T	T	T	.	No	F12/3D7A/A4	.
	8	857214	A	T	T	T	.	No	F12/3D7A/A4	.
	8	886767	C	A	A	A	.	No	F12/3D7A/A4	.
	8	886769	C	A	A	A	.	No	F12/3D7A/A4	.
	8	886772	G	T	T	T	.	No	F12/3D7A/A4	.
	8	886774	A	T	T	T	.	No	F12/3D7A/A4	.
	8	886780	G	T	T	T	.	No	F12/3D7A/A4	.
	8	886788	T	A	A	A	.	No	F12/3D7A/A4	.
	8	886794	G	A	A	A	.	No	F12/3D7A/A4	.
	8	918327	T	A	T	T	.	No	F12	.
	8	958286	T	A	A	A	.	No	F12/3D7A/A4	.
	8	958289	C	A	A	A	.	No	F12/3D7A/A4	.
	8	1062184	T	A	A	A	.	No	F12/3D7A/A4	.
	8	1062186	C	A	A	A	.	No	F12/3D7A/A4	.
	8	1377073	A	T	T	T	.	Yes	F12/3D7A/A4	.
	8	1377118	T	C	C	C	.	Yes	F12/3D7A/A4	.
	8	1377174	G	T	T	T	.	Yes	F12/3D7A/A4	.
	8	1377233	G	T	T	T	.	Yes	F12/3D7A/A4	.
	8	1419738	A	T	T	T	.	Yes	F12/3D7A/A4	.
	8	1425966	C	A	A	A	.	Yes	F12/3D7A/A4	.
	8	1426028	G	T	T	T	.	Yes	F12/3D7A/A4	.
	8	1435058	G	T	T	T	.	Yes	F12/3D7A/A4	.
	8	1435123	G	T	T	T	.	Yes	F12/3D7A/A4	.
	9	47452	C	A	A	A	.	Yes	F12/3D7A/A4	.
	9	84826	T	C	T	T	PF3D7_0901800	No	F12	Splicing Site Donor	Plasmodium exported protein, unknown function
	9	1533584	C	C	C	G	.	Yes	A4	.
	10	651501	T	G	T	T	PF3D7_1016300	No	F12	E624D	glycophorin binding protein (GBP)
	10	651549	T	G	T	T	PF3D7_1016300	No	F12	Syn	glycophorin binding protein (GBP)
	10	1437050	T	A	A	A	PF3D7_1036400	No	F12/3D7A/A4	H245Q	liver stage antigen 1 (LSA1)
	10	1584549	G	A	A	A	.	No	F12/3D7A/A4	.
	10	1584737	G	C	C	C	.	No	F12/3D7A/A4	.
	11	1131	T	T	T	A	.	Yes	A4	.
	11	6151	T	T	T	A	.	Yes	A4	.
	11	6152	G	G	G	A	.	Yes	A4	.
	11	6380	T	T	T	C	.	Yes	A4	.
	11	6389	C	C	C	T	.	Yes	A4	.
	11	6392	G	G	G	A	.	Yes	A4	.
	11	7497	A	A	A	G	.	Yes	A4	.
	11	7499	T	T	T	G	.	Yes	A4	.
	11	7500	A	A	A	G	.	Yes	A4	.
	11	7768	C	C	C	A	.	Yes	A4	.
	11	7800	T	T	T	C	.	Yes	A4	.
	11	7804	T	T	T	G	.	Yes	A4	.
	11	7813	T	T	T	G	.	Yes	A4	.
	11	8505	T	T	T	G	.	Yes	A4	.
	11	8669	C	C	C	T	.	Yes	A4	.
	11	8695	C	C	C	T	.	Yes	A4	.
	11	8785	A	A	A	T	.	Yes	A4	.
	11	9067	G	G	G	T	.	Yes	A4	.
	11	9087	T	T	T	A	.	Yes	A4	.
	11	9099	G	G	G	A	.	Yes	A4	.
	11	9103	C	C	C	G	.	Yes	A4	.
	11	9214	G	G	G	C	.	Yes	A4	.
	11	9221	T	T	T	C	.	Yes	A4	.
	11	9354	C	C	C	G	.	Yes	A4	.
	11	9355	T	T	T	G	.	Yes	A4	.
	11	9358	C	C	C	T	.	Yes	A4	.
	11	9361	C	C	C	G	.	Yes	A4	.
	11	9457	G	G	G	C	.	Yes	A4	.
	11	9461	C	C	C	T	.	Yes	A4	.
	11	9465	T	T	T	G	.	Yes	A4	.
	11	9521	T	T	T	G	.	Yes	A4	.
	11	11846	T	T	T	C	.	Yes	A4	.
	11	11860	A	A	A	T	.	Yes	A4	.
	12	190973	C	T	T	T	PF3D7_1203800	No	F12/3D7A/A4	R714K	unspecified product
	12	241169	T	A	A	A	.	No	F12/3D7A/A4	.
	12	674288	A	T	T	T	.	No	F12/3D7A/A4	.
	12	674291	A	T	T	T	.	No	F12/3D7A/A4	.
	12	725207	A	T	T	T	.	No	F12/3D7A/A4	.
	12	725210	C	T	T	T	.	No	F12/3D7A/A4	.
	12	725218	T	A	A	A	.	No	F12/3D7A/A4	.
	12	725232	C	T	T	T	.	No	F12/3D7A/A4	.
	12	725234	T	A	A	A	.	No	F12/3D7A/A4	.
	12	725249	G	A	A	A	.	No	F12/3D7A/A4	.
	12	725252	T	A	A	A	.	No	F12/3D7A/A4	.
	12	725256	T	A	A	A	.	No	F12/3D7A/A4	.
	12	911125	C	A	C	C	PF3D7_1222600	No	F12	S1308*	transcription factor with AP2 domain(s) (AP2-G)
	12	1123718	A	T	T	T	.	No	F12/3D7A/A4	.
	12	1123748	A	T	T	T	.	No	F12/3D7A/A4	.
	12	1450642	C	T	T	T	.	No	F12/3D7A/A4	.
	12	1510171	T	A	A	A	.	No	F12/3D7A/A4	.
	12	1519725	G	A	A	A	.	No	F12/3D7A/A4	.
	12	1629950	G	A	A	A	.	No	F12/3D7A/A4	.
	12	1836712	T	A	A	A	PF3D7_1243900	No	F12/3D7A/A4	Intron	double C2-like domain-containing protein (DOC2)
	12	1908146	A	T	T	T	.	No	F12/3D7A/A4	.
	12	1908160	A	T	T	T	PF3D7_1245800	No	F12/3D7A/A4	L4F	epsin, putative
	12	1908166	G	A	A	A	PF3D7_1245800	No	F12/3D7A/A4	Syn	epsin, putative
	12	1908171	T	A	A	A	PF3D7_1245800	No	F12/3D7A/A4	I8N	epsin, putative
	12	1908173	C	T	T	T	PF3D7_1245800	No	F12/3D7A/A4	Q9*	epsin, putative
	12	1908174	A	C	C	C	PF3D7_1245800	No	F12/3D7A/A4	Q9P	epsin, putative
	12	1908195	T	A	A	A	PF3D7_1245800	No	F12/3D7A/A4	I16N	epsin, putative
	12	1908217	C	A	A	A	PF3D7_1245800	No	F12/3D7A/A4	Intron	epsin, putative
	12	1908260	A	T	T	T	PF3D7_1245800	No	F12/3D7A/A4	Intron	epsin, putative
	12	1931578	T	A	A	A	.	No	F12/3D7A/A4	.
	12	2012425	G	T	T	T	.	No	F12/3D7A/A4	.
	12	2250763	A	T	T	T	.	Yes	F12/3D7A/A4	.
	12	2250768	A	T	T	T	.	Yes	F12/3D7A/A4	.
	12	2271484	C	A	A	A	.	Yes	F12/3D7A/A4	.
	13	873860	G	T	T	T	.	No	F12/3D7A/A4	.
	13	1522022	G	T	T	T	.	No	F12/3D7A/A4	.
	13	1534230	A	T	T	T	.	No	F12/3D7A/A4	.
	13	2211638	A	G	G	G	.	No	F12/3D7A/A4	.
	13	2444805	T	A	A	A	.	No	F12/3D7A/A4	.
	13	2444808	T	A	A	A	.	No	F12/3D7A/A4	.
	13	2444812	T	A	A	A	.	No	F12/3D7A/A4	.
	13	2444814	T	A	A	A	.	No	F12/3D7A/A4	.
	13	2923306	T	G	G	G	.	Yes	F12/3D7A/A4	.
	13	2923422	T	G	G	G	.	Yes	F12/3D7A/A4	.
	14	942878	A	A	A	T	PF3D7_1423400	No	A4	N95Y	conserved Plasmodium membrane protein, unknown function
	14	965968	G	A	A	A	.	No	F12/3D7A/A4	.
	14	2882375	T	T	T	C	.	No	A4	.
	14	2882411	A	A	A	G	.	No	A4	.
