# Supplementary material for: Genomic variation in two gametocyte non-producing Plasmodium falciparum clonal lines
Source: Malar J. 2016 Apr 21;15:229. doi: 10.1186/s12936-016-1254-1 (PMC4839107; doi:10.1186/s12936-016-1254-1)
Supplement: Supplementary file 2 — 10.1186/s12936-016-1254-1 Insertions (INS) and deletions (DEL) identified in the three lines 3D7A, A4 and F12. [file 12936_2016_1254_MOESM2_ESM.xlsx]

## Sheet: S2 table
	S2 table
	Insertions (INS) and deletions (DEL) identified in the three lines 3D7A, A4 and F12
	Chr	Start	End	Type	Size	3D7 (Reference)	Alternative	Genes	Clone	Sub-telomeric	Amino acid change	Product description
	1	108579	108580	INS	4	A	ATATT	.	F12/3D7A/A4	No	-
	1	122494	122497	DEL	2	AAT	A	.	A4	No	-
	1	124077	124087	DEL	9	TATTATTTTC	T	.	3D7A	No	-
	1	187953	187956	DEL	2	AAT	A	.	F12/3D7A/A4	No	-
	1	190317	190324	DEL	6	CATAATA	C	PF3D7_0104300	F12/3D7A/A4	No	HNN17H	ubiquitin carboxyl-terminal hydrolase 1, putative (UBP1
	1	270239	270240	INS	5	T	TATATA	.	3D7A/A4	No	-
	1	272428	272429	INS	1	T	TA	.	3D7A/A4	No	-
	1	287205	287206	INS	6	T	TTATATA	PF3D7_0106800	F12/3D7A/A4	No	Intron	ras-related protein Rab-5C (RAB5c)
	1	288090	288093	DEL	2	TAA	T	PF3D7_0106800	F12/3D7A/A4	No	Splice site region + Intron	ras-related protein Rab-5C (RAB5c)
	1	288303	288316	DEL	12	AATATATATATAT	A	PF3D7_0106800	F12/3D7A/A4	No	Intron	ras-related protein Rab-5C (RAB5c)
	1	288488	288489	INS	1	A	AT	PF3D7_0106800	F12/3D7A/A4	No	Intron	ras-related protein Rab-5C (RAB5c)
	1	289306	289317	DEL	10	GATATATATAT	G	.	F12/3D7A/A4	No	-
	1	289466	289467	INS	4	A	AATAT	.	F12/3D7A/A4	No	-
	1	293766	293781	DEL	14	GTAAATAATAAATAA	G	PF3D7_0107000	F12/3D7A/A4	No	Splice Site Donor + Splice site region + Intron	centrin-1 (CEN1)
	1	293829	293836	DEL	6	AATATAT	A	PF3D7_0107000	F12/3D7A/A4	No	Intron	centrin-1 (CEN1)
	1	294071	294072	INS	6	C	CATATAT	PF3D7_0107000	F12/3D7A	No	Intron	centrin-1 (CEN1)
	1	294390	294399	DEL	8	CATATATAT	C	PF3D7_0107000	F12/3D7A/A4	No	Intron	centrin-1 (CEN1)
	1	311920	311921	INS	2	G	GAA	.	F12/A4	No	-
	1	319523	319530	DEL	6	AATATAT	A	.	3D7A/A4	No	-
	1	319742	319743	INS	2	T	TTA	.	F12/3D7A/A4	No	-
	1	320629	320636	DEL	6	CAATAAT	C	PF3D7_0107700	F12/3D7A/A4	No	NN155	conserved Plasmodium protein, unknown function
	1	326194	326195	INS	1	A	AT	.	F12/3D7A/A4	No	-
	1	333937	333938	INS	4	A	AATAT	.	F12/3D7A/A4	No	-
	1	371593	371594	INS	1	G	GT	.	F12/3D7A/A4	No	-
	1	417248	417249	INS	1	G	GA	.	A4	No	-
	1	430485	430486	INS	1	A	AT	PF3D7_0111200	F12/A4	No	Intron	conserved Plasmodium protein, unknown function
	1	440423	440426	DEL	2	CAT	C	PF3D7_0111500	3D7A	No	Intron	UMP-CMP kinase, putative
	1	444241	444244	DEL	2	CAT	C	.	F12/3D7A/A4	No	-
	1	444671	444672	INS	1	A	AT	.	F12/3D7A/A4	No	-
	1	444895	444896	INS	2	T	TTA	.	3D7A	No	-
	1	491535	491536	INS	1	C	CA	.	F12/3D7A/A4	No	-
	2	167752	167753	INS	5	A	AATATT	PF3D7_0203600	F12	No	Frame shift (N537NI?)	conserved Plasmodium protein, unknown function
	2	674686	674687	INS	4	T	TTTTA	.	F12/3D7A/A4	No	-
	2	676139	676140	INS	3	G	GATA	PF3D7_0216400	F12/3D7A/A4	No	D239DN	vacuolar protein sorting-associated protein 45, putative (VPS45)
	3	87222	87225	DEL	2	TTA	T	.	F12/3D7A/A4	No	-
	3	100628	100631	DEL	2	CAT	C	.	F12/3D7A/A4	No	-
	3	151467	151468	INS	2	A	AAT	.	F12/3D7A/A4	No	-
	3	190133	190134	INS	2	T	TTA	.	A4	No	-
	3	210874	210875	INS	2	T	TAA	.	F12	No	-
	3	211353	211354	INS	2	C	CAT	.	3D7A/A4	No	-
	3	248706	248707	INS	2	A	AAT	.	A4	No	-
	3	249397	249402	DEL	4	CATAT	C	.	3D7A/A4	No	-
	3	291053	291056	DEL	2	AAT	A	.	F12/3D7A/A4	No	-
	3	314787	314789	DEL	1	AG	A	.	A4	No	-
	3	426049	426050	INS	1	C	CT	.	F12/3D7A/A4	No	-
	3	426391	426394	DEL	2	CTA	C	.	F12	No	-
	3	486435	486438	DEL	2	CAT	C	.	F12/3D7A/A4	No	-
	3	499114	499117	DEL	2	TTA	T	.	F12/3D7A/A4	No	-
	3	527747	527750	DEL	2	CAT	C	.	F12/3D7A/A4	No	-
	3	532854	532855	INS	8	T	TTATATATA	.	F12/3D7A/A4	No	-
	3	630529	630534	DEL	4	AATAT	A	.	F12/3D7A/A4	No	-
	3	697432	697433	INS	2	G	GTA	.	F12/3D7A/A4	No	-
	3	710547	710550	DEL	2	TTA	T	.	3D7A/A4	No	-
	3	710604	710605	INS	1	G	GA	.	F12/3D7A/A4	No	-
	3	711223	711226	DEL	2	AAT	A	.	F12/3D7A/A4	No	-
	3	715545	715546	INS	1	A	AT	.	F12/3D7A/A4	No	-
	3	723186	723187	INS	4	T	TTATA	.	F12/3D7A/A4	No	-
	3	761241	761242	INS	2	A	AAT	.	F12/3D7A/A4	No	-
	3	820211	820221	DEL	9	TCCGTCGCCG	T	.	3D7A	No	-
	3	863846	863849	DEL	2	TTA	T	.	F12/3D7A/A4	No	-
	3	892809	892811	DEL	1	AG	A	.	A4	No	-
	3	911136	911137	INS	2	C	CTA	.	A4	No	-
	3	976063	976066	DEL	2	AAT	A	.	F12	No	-
	3	997014	997017	DEL	2	CAT	C	.	F12/A4	No	-
	4	203655	203658	DEL	2	GTA	G	.	F12/3D7A/A4	No	-
	4	204564	204567	DEL	2	CAT	C	.	3D7A	No	-
	4	217263	217265	DEL	1	TA	T	.	F12/3D7A/A4	No	-
	4	244983	244988	DEL	4,2	AATAT	A,AAT	.	A4	No	-
	4	245839	245840	INS	1	T	TA	.	F12/A4	No	-
	4	250092	250099	DEL	6	CATAATA	C	PF3D7_0404600	F12/3D7A/A4	No	HNN788H	conserved Plasmodium membrane protein, unknown function
	4	250394	250401	DEL	6	AACCACC	A	PF3D7_0404600	F12/3D7A/A4	No	TT889	conserved Plasmodium membrane protein, unknown function
	4	260276	260279	DEL	2	TTA	T	.	A4	No	-
	4	278558	278559	INS	8	C	CATATATAT	.	F12/3D7A/A4	No	-
	4	303188	303199	DEL	10	TTATATATATA	T	.	F12/3D7A/A4	No	-
	4	313649	313662	DEL	12	AATATATATATAT	A	.	F12/3D7A/A4	No	-
	4	313874	313876	DEL	1	AT	A	.	F12/3D7A/A4	No	-
	4	320254	320256	DEL	1	AT	A	.	F12/3D7A/A4	No	-
	4	332408	332411	DEL	2	AAT	A	PF3D7_0406400	F12/3D7A	No	Intron	cytosolic glyoxalase II (cGloII)
	4	355717	355718	INS	9	A	ACATTTTTTT	PF3D7_0406900	A4	No	V1177EKNV	conserved Plasmodium protein, unknown function
	4	367452	367453	INS	10	T	TTATATATATA	.	F12/3D7A/A4	No	-
	4	369999	370004	DEL	4	TTATA	T	PF3D7_0407500	F12/3D7A/A4	No	Intron	mitochondrial carrier protein, putative
	4	383325	383334	DEL	8	CTATATATA	C	.	F12/3D7A/A4	No	-
	4	497382	497386	DEL	3	TAAA	T	.	F12	No	-
	4	535868	535869	INS	2	A	AAT	.	F12	No	-
	4	717153	717154	INS	1	A	AT	.	F12/3D7A/A4	No	-
	4	739929	739930	INS	2	A	AAT	.	F12/3D7A/A4	No	-
	4	816061	816063	DEL	1	TA	T	.	F12/3D7A/A4	No	-
	4	877564	877567	DEL	2	AAT	A	.	3D7A/A4	No	-
	4	878287	878289	DEL	1	TA	T	PF3D7_0419900	F12/3D7A/A4	No	Splice site region + Intron	phosphatidylinositol 4-kinase, putative
	4	914052	914055	DEL	2	AAT	A	.	F12/3D7A/A4	No	-
	4	914782	914784	DEL	1	AT	A	.	F12/3D7A/A4	No	-
	4	915429	915432	DEL	2	GTA	G	.	F12/3D7A/A4	No	-
	4	1039286	1039288	DEL	1	TA	T	.	A4	No	-
	4	1084343	1084344	INS	1	G	GA	.	F12/3D7A/A4	No	-
	4	1122652	1122654	DEL	1	AT	A	.	A4	No	-
	5	72040	72041	INS	2	C	CTA	.	F12/3D7A/A4	No	-
	5	614974	614979	DEL	4	ATAAT	A	.	A4	No	-
	5	614993	614998	DEL	4	ATAAT	A	.	F12/A4	No	-
	5	653393	653394	INS	2	T	TTA	.	F12	No	-
	5	877756	877757	INS	1	T	TA	.	F12/3D7A/A4	No	-
	5	955881	955882	INS	2	T	TTA	.	A4	No	-
	5	1032638	1032640	DEL	1	AT	A	.	F12/3D7A	No	-
	5	1032927	1032928	INS	1	T	TA	.	F12/3D7A/A4	No	-
	5	1033008	1033009	INS	1	C	CA	.	3D7A	No	-
	6	1094657	1094677	DEL	19	TCTTATAATTTTATTAATAA	T	.	3D7A	No	-
	7	148566	148575	DEL	8	AATATATAT	A	.	F12/3D7A/A4	No	-
	7	190947	190950	DEL	2	GTA	G	.	3D7A	No	-
	7	214907	214921	DEL	13	TATTCTTTTTTATG	T	.	A4	No	-
	7	380811	380812	INS	1	G	GA	.	A4	No	-
	7	380877	380880	DEL	2	CTA	C	.	A4	No	-
	7	380904	380913	DEL	8	TATATATAA	T	.	A4	No	-
	7	380982	380983	INS	1	C	CT	.	A4	No	-
	7	381035	381037	DEL	1	CT	C	.	A4	No	-
	7	381337	381342	DEL	4	TTATA	T	.	A4	No	-
	7	381459	381460	INS	2	G	GTA	.	A4	No	-
	7	459160	459161	INS	1	T	TA	.	A4	No	-
	7	722246	722247	INS	2	C	CAT	PF3D7_0716500	A4	No	Intron	conserved Plasmodium protein, unknown function
	7	839236	839237	INS	4	C	CATAT	PF3D7_0719100	F12/3D7A/A4	No	Intron	conserved Plasmodium protein, unknown function
	7	1005376	1005378	DEL	1	AT	A	.	F12	No	-
	7	1088610	1088611	INS	1	T	TA	PF3D7_0726000	F12/A4	No	Frame shift (681?)	28S ribosomal RNA
	7	1088643	1088645	DEL	1	CT	C	PF3D7_0726000	F12/A4	No	Frame shift (692?)	28S ribosomal RNA
	7	1265750	1265751	INS	1	T	TA	.	F12/3D7A/A4	No	-
	8	65587	65589	DEL	1	CA	C	.	F12/3D7A/A4	No	-
	8	123517	123525	DEL	7	TGGGGCAA	T	.	3D7A/A4	No	-
	8	217485	217488	DEL	2	TAC	T	.	F12	No	-
	8	282495	282496	INS	4	A	ATTTT	.	F12/3D7A/A4	No	-
	8	538087	538088	INS	1	T	TA	.	F12	No	-
	8	757774	757775	INS	2	C	CAT	PF3D7_0816400	F12	No	Intron	conserved Plasmodium protein, unknown function
	8	785496	785503	DEL	6	GTATTAT	G	PF3D7_0817300	F12/3D7A/A4	No	NNT1372T	asparagine-rich antigen
	8	841899	841901	DEL	1	AT	A	.	F12/3D7A/A4	No	-
	8	841900	841901	INS	1	T	TA	.	3D7A	No	-
	8	886796	886798	DEL	1	CG	C	.	F12/3D7A/A4	No	-
	8	922027	922028	INS	1	G	GA	.	F12	No	-
	8	1080636	1080640	DEL	3	TATC	T	PF3D7_0824900	A4	No	D785	conserved Plasmodium protein, unknown function
	8	1271720	1271721	INS	1	C	CT	PF3D7_0829700	F12/3D7A/A4	No	Frame shift (S148S?)	unspecified product
	9	236031	236032	INS	5	A	AATAAT	.	F12/3D7A/A4	No	-
	9	332053	332057	DEL	3	ATAT	A	.	F12/A4	No	-
	10	105236	105237	INS	4	T	TTATA	.	F12	No	-
	10	220381	220384	DEL	2	AGT	A	PF3D7_1004700	3D7A	No	Intron	conserved Plasmodium protein, unknown function
	10	415852	415853	INS	1	T	TA	PF3D7_1010400	3D7A	No	Intron	conserved Plasmodium protein, unknown function
	10	422310	422312	DEL	1	AT	A	.	F12/3D7A/A4	No	-
	10	917075	917076	INS	1	A	AT	.	F12/3D7A/A4	No	-
	10	917169	917171	DEL	1	AT	A	.	F12/3D7A/A4	No	-
	10	936705	936706	INS	2	A	AAT	.	F12/3D7A/A4	No	-
	10	1180690	1180692	DEL	1	CA	C	.	A4	No	-
	10	1494637	1494638	INS	2	C	CAT	.	F12	No	-
	11	337578	337579	INS	1	T	TA	.	F12/3D7A	No	-
	11	599517	599519	DEL	1	GA	G	.	F12/3D7A/A4	No	-
	11	1691731	1691732	INS	4	T	TTATA	.	F12	No	-
	11	1695273	1695274	INS	1	A	AT	.	A4	No	-
	12	85950	85951	INS	1	G	GA	.	F12/3D7A/A4	No	-
	12	433342	433343	INS	1	C	CA	.	3D7A/A4	No	-
	12	497609	497611	DEL	1	AT	A	.	F12/3D7A/A4	No	-
	12	534054	534055	INS	1	C	CT	.	F12/3D7A/A4	No	-
	12	587982	587983	INS	1	G	GA	.	F12/3D7A/A4	No	-
	12	589682	589683	INS	1	A	AT	.	A4	No	-
	12	620227	620231	DEL	3	TATC	T	.	F12/3D7A/A4	No	-
	12	677727	677728	INS	1	G	GA	.	3D7A	No	-
	12	725103	725104	INS	1	T	TA	.	F12/3D7A/A4	No	-
	12	798077	798078	INS	2	C	CAT	.	A4	No	-
	12	913765	913767	INS	1	TAAAA	TAAAAA	PF3D7_1222600	A4	No	Frame shift (K2187K?)	transcription factor with AP2 domain(s) (AP2-G)
	12	919583	919584	INS	2	T	TTA	.	F12	No	-
	12	962065	962066	INS	1	T	TA	.	A4	No	-
	12	972344	972345	INS	1	C	CT	.	F12	No	-
	12	984334	984335	INS	2	A	AAT	PF3D7_1224200	F12	No	Intron	conserved Plasmodium protein, unknown function
	12	1002494	1002497	DEL	2	AAT	A	.	F12	No	-
	12	1062869	1062872	DEL	2	TCC	T	.	F12/3D7A/A4	No	-
	12	1062889	1062892	DEL	2	TCC	T	.	F12/3D7A/A4	No	-
	12	1193293	1193294	INS	1	A	AT	PF3D7_1229100	F12	No	Frame shift (N1974K?)	multidrug resistance-associated protein 2 (MRP2)
	12	1510177	1510178	INS	1	T	TA	.	F12/3D7A/A4	No	-
	12	1581341	1581342	INS	1	G	GA	.	F12	No	-
	12	1624977	1624981	DEL	3	GCTC	G	.	F12/3D7A/A4	No	-
	12	1713076	1713077	INS	1	T	TA	.	F12	No	-
	12	1789165	1789166	INS	2	C	CAA	.	3D7A	No	-
	12	1795543	1795544	INS	1	C	CA	.	3D7A	No	-
	12	1836693	1836696	DEL	2	AGG	A	PF3D7_1243900	F12/3D7A/A4	No	Intron	double C2-like domain-containing protein (DOC2)
	12	1836710	1836718	DEL	7,2	ATTAAAAG	A,AAAAAG	PF3D7_1243900	F12/3D7A/A4	No	Intron	double C2-like domain-containing protein (DOC2)
	12	1922177	1922183	DEL	5	ATTGTT	A	.	F12/3D7A/A4	No	-
	12	2010069	2010070	INS	1	G	GT	.	3D7A	No	-
	12	2098998	2099003	DEL	4	ATAAT	A	.	F12/3D7A/A4	No	-
	13	346223	346230	DEL	6	GATAATA	G	PF3D7_1307700	F12	No	DNN576D	conserved Plasmodium protein, unknown function
	13	414262	414263	INS	2	A	AAT	.	3D7A/A4	No	-
	13	547837	547838	INS	1	C	CA	.	3D7A/A4	No	-
	13	663152	663154	DEL	1	TA	T	.	F12	No	-
	13	962170	962181	DEL	10	TTCTCTCTCTC	T	PF3D7_1322900	F12	No	Intron	conserved Plasmodium protein, unknown function
	13	981237	981238	INS	3,5	A	AAT,AATAT	.	F12	No	-
	13	1138800	1138806	DEL	5	TATATA	T	PF3D7_1327100	3D7A	No	Intron	conserved Plasmodium protein, unknown function
	13	1145475	1145486	DEL	10	AATATATATAT	A	.	F12	No	-
	13	1160106	1160107	INS	4	A	ATTAT	.	F12	No	-
	13	1250401	1250402	INS	1	C	CT	.	F12/A4	No	-
	13	1251686	1251689	DEL	2	GCC	G	.	3D7A/A4	No	-
	13	1521948	1521949	INS	1	G	GA	.	3D7A	No	-
	13	1694865	1694866	INS	1	C	CA	.	F12	No	-
	13	1950555	1950556	INS	4	G	GTATA	PF3D7_1348500	F12	No	Intron	TBC domain protein, putative
	13	2096878	2096879	INS	2	G	GAA	PF3D7_1352600	F12/3D7A/A4	No	Intron	protein kinase, putative
	13	2359076	2359079	DEL	2	TGA	T	.	F12	No	-
	13	2370064	2370065	INS	1	A	AT	.	F12/3D7A/A4	No	-
	13	2561540	2561548	DEL	7	TGATAGAA	T	.	F12/3D7A	No	-
	13	2797001	2797004	DEL	2	AGT	A	PF3D7_1370800	F12	No	Frame shift (S295)	unspecified product
	13	2797034	2797037	DEL	2	AGT	A	PF3D7_1370800	F12/3D7A/A4	No	Frame shift (S306)	unspecified product
	13	2808449	2808450	INS	2	C	CTA	.	F12/3D7A/A4	No	-
	14	109928	109929	INS	1	A	AT	.	F12/3D7A/A4	No	-
	14	573037	573040	DEL	2	CTA	C	.	F12/3D7A	No	-
	14	573767	573768	INS	1	G	GA	.	F12/3D7A/A4	No	-
	14	573828	573833	DEL	4	TTATA	T	.	F12/3D7A	No	-
	14	623828	623829	INS	1	C	CT	.	F12/3D7A/A4	No	-
	14	966022	966025	DEL	2	TTA	T	.	F12/3D7A	No	-
	14	966077	966079	DEL	1	GT	G	.	F12/3D7A/A4	No	-
	14	1153878	1153879	INS	4	G	GATAT	.	A4	No	-
	14	1154613	1154614	INS	1	C	CA	.	F12/3D7A/A4	No	-
	14	1187382	1187387	DEL	4	AGAAG	A	.	F12/3D7A/A4	No	-
	14	1262306	1262308	DEL	1	AT	A	PF3D7_1432100	A4	No	Intron	voltage-dependent anion-selective channel protein, putative
	14	1339030	1339033	DEL	2	AAT	A	.	F12/3D7A/A4	No	-
	14	1340189	1340190	INS	1	G	GT	.	F12	No	-
	14	1369901	1369902	INS	2	A	AAT	.	A4	No	-
	14	1372601	1372612	DEL	10	TAAAAAAAAAA	T	.	A4	No	-
	14	1372823	1372824	INS	1	A	AT	.	A4	No	-
	14	1535030	1535034	DEL	3	AGAG	A	.	A4	No	-
	14	1659059	1659060	INS	2	A	AAT	PF3D7_1440600	F12	No	Intron	conserved Plasmodium protein, unknown function
	14	2029231	2029233	DEL	1	TA	T	.	F12/3D7A/A4	No	-
	14	2543352	2543354	DEL	1	AT	A	.	A4	No	-
	14	2757620	2757623	DEL	2	TGC	T	.	3D7A/A4	No	-
	14	2824219	2824220	INS	2	T	TTA	.	F12/3D7A/A4	No	-
	14	2882361	2882365	DEL	3	ATTT	A	.	A4	No	-
	14	2883797	2883802	DEL	4	AATAT	A	PF3D7_1470500	A4	No	Intron	phosphodiesterase delta, putative (PDEdelta)
	14	2997114	2997116	DEL	1	TA	T	.	F12/3D7A/A4	No	-
	14	3018860	3018861	INS	1	C	CA	.	F12/A4	No	-
	API	1303	1304	INS	1	G	GT	.	F12/3D7A/A4	No	-
	API	1420	1422	DEL	1	CA	C	.	F12/3D7A/A4	No	-
	API	1667	1669	DEL	1	GT	G	.	F12/3D7A/A4	No	-
	API	3548	3549	INS	1	T	TA	.	F12/3D7A/A4	No	-
	API	3835	3837	DEL	1	TA	T	.	F12/3D7A/A4	No	-
	API	5483	5484	INS	2	A	AAT	.	F12/3D7A/A4	No	-
	API	12152	12153	INS	3	T	TATA	.	F12/3D7A/A4	No	-
	API	13995	14010	DEL	14	TTTACATATTTTTAA	T	.	F12/3D7A/A4	No	-
	API	26696	26697	INS	1	T	TC	.	F12/3D7A/A4	No	-
	API	28224	28225	INS	1	T	TA	.	F12/3D7A/A4	No	-
	1	57380	57392	DEL	11	ATATATATATAT	A	.	F12/3D7A/A4	Yes	-
	1	58340	58341	INS	2	A	ATT	.	3D7A/A4	Yes	-
	1	69215	69216	INS	1	A	AT	.	F12/A4	Yes	-
	1	73497	73498	INS	2	A	AAT	.	F12	Yes	-
	1	74424	74425	INS	1	T	TA	.	F12/3D7A/A4	Yes	-
	1	75673	75675	DEL	1	GA	G	.	F12	Yes	-
	1	568028	568029	INS	1	C	CA	.	A4	Yes	-
	1	572399	572400	INS	1	A	AT	.	F12/3D7A/A4	Yes	-
	1	575191	575192	INS	1	T	TA	.	A4	Yes	-
	2	194	195	INS	1	A	AC	.	A4	Yes	-
	2	61892	61894	DEL	1	TA	T	.	3D7A	Yes	-
	2	719267	719270	DEL	2	AGG	A	.	3D7A	Yes	-
	2	884312	884313	INS	2	A	AAT	.	A4	Yes	-
	3	1230	1232	DEL	1	GA	G	.	F12	Yes	-
	3	1533	1535	DEL	1	AC	A	.	3D7A	Yes	-
	3	1577	1580	DEL	2	CCT	C	.	3D7A/A4	Yes	-
	3	2907	2909	DEL	1	AC	A	.	A4	Yes	-
	3	3103	3105	DEL	1	AC	A	.	A4	Yes	-
	3	3173	3175	DEL	1	AC	A	.	3D7A	Yes	-
	3	75491	75494	DEL	2	CAT	C	.	F12/3D7A	Yes	-
	3	250777	250785	DEL	7	TTTATATA	T	.	F12/3D7A/A4	Yes	-
	3	833534	833537	DEL	2	ATG	A	.	3D7A/A4	Yes	-
	3	1064372	1064374	DEL	1	AG	A	.	A4	Yes	-
	4	95846	95849	DEL	2	AAT	A	.	F12/3D7A/A4	Yes	-
	4	96403	96406	DEL	2	CAT	C	.	F12/3D7A	Yes	-
	4	116935	116938	DEL	2	AAT	A	.	F12/3D7A/A4	Yes	-
	4	119135	119138	DEL	2	GAT	G	.	F12/3D7A/A4	Yes	-
	4	340716	340717	INS	1	G	GT	PF3D7_0406500	F12/3D7A	Yes	Frame shift (I1113I?)	conserved Plasmodium protein, unknown function
	4	1154384	1154385	INS	2	T	TAA	.	F12	Yes	-
	4	1200112	1200113	INS	1	G	GT	.	A4	Yes	-
	5	1331878	1331879	INS	1	G	GA	.	F12	Yes	-
	5	1332586	1332588	DEL	1	AC	A	.	F12/A4	Yes	-
	5	1332611	1332613	DEL	1	TC	T	.	F12/3D7A/A4	Yes	-
	6	128	130	DEL	1	AC	A	.	A4	Yes	-
	6	29426	29428	DEL	1	CA	C	.	A4	Yes	-
	6	53166	53169	DEL	2	TAA	T	.	3D7A	Yes	-
	6	53319	53320	INS	3	A	ATAT	.	F12/A4	Yes	-
	6	1312762	1312764	DEL	1	TA	T	.	F12/3D7A/A4	Yes	-
	6	1313284	1313285	INS	3	T	TATA	.	F12/3D7A/A4	Yes	-
	6	1417957	1417958	INS	1	T	TG	.	3D7A/A4	Yes	-
	7	821	823	DEL	1	AC	A	.	3D7A/A4	Yes	-
	7	87260	87263	DEL	2	TTA	T	.	F12/3D7A/A4	Yes	-
	7	113521	113528	DEL	6	AATATAT	A	PF3D7_0702900	F12	Yes	Intron	centrin, putative
	8	701497	701498	INS	6	C	CAATAAT	PF3D7_0814500	F12/3D7A/A4	Yes	N375NNN	conserved Plasmodium protein, unknown function
	8	950012	950014	DEL	1	TA	T	PF3D7_0821000	F12/3D7A/A4	Yes	Intron	conserved Plasmodium protein, unknown function
	8	1353781	1353782	INS	1	A	AT	PF3D7_0831500	3D7A	Yes	Intron	Plasmodium exported protein (PHIST), unknown function
	8	1374148	1374150	DEL	1	CA	C	.	A4	Yes	-
	8	1376995	1376996	INS	1	T	TG	.	F12/A4	Yes	-
	8	1384271	1384278	DEL	6	TTATATA	T	PF3D7_0832000	F12/3D7A/A4	Yes	Intron	stevor
	9	65714	65719	DEL	4	GTATA	G	.	F12	Yes	-
	10	1216157	1216161	DEL	3	TGTG	T	.	F12	Yes	-
	11	11827	11840	DEL	12	AACAACATCACGT	A	.	A4	Yes	-
	11	2038221	2038222	INS	1	T	TC	.	A4	Yes	-
	12	2199052	2199053	INS	2	C	CTA	.	F12/A4	Yes	-
	13	548455	548458	DEL	2	AAT	A	.	3D7A	Yes	-
	13	2846593	2846602	DEL	8	AATATATAT	A	.	F12/A4	Yes	-
	13	2847944	2847946	DEL	1	GT	G	.	3D7A	Yes	-
	13	2923702	2923704	DEL	1	AG	A	.	F12	Yes	-
	13	2923735	2923736	INS	1	T	TC	.	F12/A4	Yes	-
	13	2923771	2923773	DEL	1	AG	A	.	F12	Yes	-
