# Supplementary material for: Genomic variation in two gametocyte non-producing Plasmodium falciparum clonal lines
Source: Malar J. 2016 Apr 21;15:229. doi: 10.1186/s12936-016-1254-1 (PMC4839107; doi:10.1186/s12936-016-1254-1)
Supplement: Supplementary file 3 — 10.1186/s12936-016-1254-1 SNPs and Indels identified in the PF3D7_1222600 gene among P. falciparum field isolates from Africa and Asia. [file 12936_2016_1254_MOESM3_ESM.xlsx]

## Sheet: S3 table
	S3 table
	SNPs and Indels identified in the PF3D7_1222600 gene among P.falciparum field isolates from Africa and Asia
	Position	Type	Reference	Alternative	Type	Amino acid change	GATK Quality
	907264	SNPs	A	G		K21R	NA
	907280	SNPs	T	C		Syn	NA
	907450	Indel	AATATATACAT	A	INTRON	-	1263.73
	907456	Indel	TAC	T	INTRON	-	401.73
	907460	Indel	TATATATAAATATATAA	T	INTRON	-	1446.73
	907468	Indel	AATATATAAAT	A	INTRON	-	972.73
	907474	Indel	TAA	T	INTRON	-	2275.73
	907476	Indel	A	AATAT	INTRON	-	2343.73
	907483	SNPs	T	A		V94E	NA
	907656	SNPs	G	A		V152I	NA
	907755	SNPs	G	A		A185T	NA
	907768	Indel	TAATGATAAGAATGATAAG	T	CODON_DELETION	NDKNDK1160	3342.73
	907861	SNPs	C	G		P220R	NA
	907895	SNPs	C	A		N231K	NA
	908012	SNPs	T	C		Syn	NA
	908019	SNPs	T	C		Y273H	NA
	908024	SNPs	G	A		Syn	NA
	908372	SNPs	T	C		Syn	NA
	908380	SNPs	A	C		Q393P	NA
	908621	Indel	TATAAAAATGAAACGGATGAGGGAA	T	CODON_DELETION	YKNETDEGN1444Y	2214.74
	908675	Indel	A	AATGATAATGATG	CODON_INSERTION	N1462NDNDD	9836.73
	908681	Indel	A	AATGATGATGATAATT	CODON_INSERTION	N1464NDDDNY	4450.73
	908684	Indel	G	GATGATGATAATT	CODON_INSERTION	D1465DDDNY	2075.73
	908708	SNPs	T	C		Syn	NA
	908759	SNPs	T	A		Syn	NA
	908784	SNPs	A	G		N528D	NA
	908840	SNPs	C	T		Syn	NA
	908908	SNPs	A	G		N569S	NA
	908962	SNPs	T	C		I587T	NA
	908988	SNPs	A	T		N596Y	NA
	909016	SNPs	A	T		D605V	NA
	909030	SNPs	G	A		V610I	NA
	909100	SNPs	C	A		T633K	NA
	909114	SNPs	G	C		E638Q	NA
	909115	SNPs	A	G		E638G	NA
	909118	SNPs	G	A		S639N	NA
	909124	SNPs	A	T		D641V	NA
	909157	SNPs	A	C		D652A	NA
	909159	SNPs	G	C		D653H	NA
	909160	SNPs	A	T		D653V	NA
	909162	SNPs	G	A		D654N	NA
	909267	SNPs	T	C		Syn	NA
	909299	SNPs	C	T		Syn	NA
	909384	SNPs	C	A		H728N	NA
	909397	SNPs	A	G		N732S	NA
	909433	SNPs	G	A		S744N	NA
	909442	SNPs	A	G		N747S	NA
	909470	SNPs	T	C		Syn	NA
	909487	Indel	AAAT	A	CODON_DELETION	N1733	7106.73
	909508	SNPs	G	C		S769T	NA
	909724	SNPs	C	A		T841N	NA
	909769	SNPs	A	C		K856T	NA
	909770	Indel	A	AATGATAAAATAAAAG	CODON_INSERTION	N1827NDKIKD	4497.73
	909881	SNPs	C	T		Syn	NA
	909899	SNPs	C	T		Syn	NA
	909911	SNPs	C	T		Syn	NA
	909917	SNPs	C	T		Syn	NA
	909957	SNPs	C	A		L919M	NA
	910008	Indel	GTAATCACTATGATTTGGA	G	CODON_DELETION	CNHYDLD1906C	2723.73
	910040	SNPs	A	T		K946N	NA
	910153	SNPs	A	C		K984T	NA
	910253	SNPs	C	T		N1017	NA
	910324	SNPs	T	A		I1041K	NA
	910499	SNPs	C	T		Syn	NA
	910502	SNPs	G	T		M1100I	NA
	910532	SNPs	C	T		Syn	NA
	910540	SNPs	A	C		E1113A	NA
	910614	SNPs	C	T		H1138Y	NA
	910741	SNPs	G	A		G1180E	NA
	910826	SNPs	C	T		Syn	NA
	910871	SNPs	T	G		Syn	NA
	911015	SNPs	T	C		Syn	NA
	911025	Indel	GTAA	G	CODON_DELETION	RN2245R	3132.73
	911033	Indel	AATAATG	A	CODON_DELETION	NND2248N	2914.73
	911080	Indel	CTAT	C	CODON_DELETION	Y2264	3044.73
	911090	Indel	GATA	G	CODON_DELETION	DN2267D	715.73
	911195	Indel	G	GATA	CODON_INSERTION	D2302DN	1591.73
	911213	SNPs	T	C		Syn	NA
	911222	SNPs	C	T		Syn	NA
	911247	Indel	ATCG	A	CODON_DELETION	HR2319H	1654.74
	911273	SNPs	T	C		Syn	NA
	911468	SNPs	A	G		Syn	NA
	911532	SNPs	A	G		S1444G	NA
	911584	SNPs	A	C		K1461T	NA
	911588	SNPs	T	A		N1462K	NA
	911626	SNPs	A	G		N1475S	NA
	911635	SNPs	C	T		A1478V	NA
	911672	Indel	TATAATA	T	CODON_DELETION	YNN2461Y	3038.73
	911675	SNPs	T	A		N1491K	NA
	911735	SNPs	T	A		N1511K	NA
	911765	SNPs	T	C		Syn	NA
	911916	SNPs	C	A		Q1572K	NA
	911963	SNPs	C	A		D1587E	NA
	912030	SNPs	A	G		I1610V	NA
	912069	Indel	A	ATAT	CODON_INSERTION	N2593NI	2756.73
	912084	Indel	ATAT	A	CODON_DELETION	NI2598N	1958.73
	912106	SNPs	A	T		D1635V	NA
	912113	Indel	GATGATA	G	CODON_DELETION	DDN2608D	1888.73
	912143	Indel	AATG	A	CODON_DELETION	ND2618N	485.73
	912149	Indel	GATGATA	G	CODON_DELETION	DDN2620D	1399.73
	912155	Indel	AATAATAATGATG	A	CODON_DELETION	NNNDD2622N	764.06
	912161	Indel	AATGATGATAATAATG	AATGATGATGATAATAATG,A	CODON_INSERTION,CODON_DELETION	N2627DN,NDDNND2624N	4726.73
	912167	Indel	G	GATGATA	CODON_INSERTION	D2626DDN	2182.73
	912167	SNPs	G	T		M1655I	NA
	912171	Indel	A	ATAATAT	CODON_INSERTION	N2627NNI	4107.73
	912172	SNPs	A	T		N1657I	NA
	912189	Indel	TTAATAATGA	T	CODON_DELETION	INND2633I	1165.73
	912194	Indel	AATGATAATAATGATG	A	CODON_DELETION	NDNNDD2635N	5844.73
	912197	Indel	GATAATAATGATGATGATAATA	G	CODON_DELETION	DNNDDDNN2636D	2282.73
	912203	Indel	A	AATG	CODON_INSERTION	N2638ND	329.75
	912212	Indel	G	GATA	CODON_INSERTION	D2641DN	694.73
	912253	SNPs	G	A		C1684Y	NA
	912410	SNPs	C	T		Syn	NA
	912646	Indel	AGAAAAAAAAAAAAAT	A	CODON_DELETION	EKKKN2786	3821.73
	912653	Indel	AAAAAAAATG	A	CODON_DELETION	KKNE2788K	1136.73
	912669	Indel	ATGAAAG	A	CODON_DELETION	NES2793N	3888.73
	912675	Indel	G	GAAA	CODON_CHANGE_PLUS_CODON_INSERTION	S2795RN	6356.73
	912681	Indel	AAAATGAAAG	A	CODON_DELETION	KNER2797K	4605.73
	912701	Indel	AATGAAAAAAATGAAAAAC	A	CODON_CHANGE_PLUS_CODON_DELETION	NEKNEKH2804N	2932.73
	912704	Indel	GAAA	G	CODON_DELETION	EK2805E	328.73
	912710	Indel	A	AACGAAAAAC	CODON_CHANGE_PLUS_CODON_INSERTION	N2807NEKH	1161.74
	912712	Indel	TGAAAAACAC	T	CODON_DELETION	EKH2808	5212.73
	912798	SNPs	A	G		I1866V	NA
	912834	SNPs	C	A		R1878S	NA
	912840	SNPs	G	A		D1880N	NA
	912842	SNPs	C	A		D1880E	NA
	912971	SNPs	A	G		Syn	NA
	913124	SNPs	A	T		K1974N	NA
	913128	SNPs	G	A		E1976K	NA
	913139	SNPs	C	A		N1979K	NA
	913157	SNPs	C	A		N1985K	NA
	913393	Indel	AAATAAT	A	CODON_DELETION	NN3035	5846.73
	913646	SNPs	A	G		I2148M	NA
	913664	SNPs	A	G		Syn	NA
	913701	Indel	AAAG	A	CODON_DELETION	KR3137K	2590.73
	914176	SNPs	A	G		D2325G	NA
	914331	SNPs	C	A		Q2377K	NA
