# Supplementary material for: Genomic variation in two gametocyte non-producing Plasmodium falciparum clonal lines
Source: Malar J. 2016 Apr 21;15:229. doi: 10.1186/s12936-016-1254-1 (PMC4839107; doi:10.1186/s12936-016-1254-1)
Supplement: Supplementary file 4 — 10.1186/s12936-016-1254-1 Structural variants identified in the three lines 3D7A, A4 and F12. [file 12936_2016_1254_MOESM4_ESM.xlsx]

## Sheet: S4 table
	S4 table
	Structural variants identified in the three lines 3D7A, A4 and F12
	Chormosome Start	Position start	Chormosome End	Position end	Type*	Sample	Gene	Product description
	Pf3D7_01_v3	238463	Pf3D7_01_v3	238577	DEL	A4	.
	Pf3D7_01_v3	377729	Pf3D7_01_v3	377761	DEL	3D7A,F12	.
	Pf3D7_01_v3	444685	Pf3D7_01_v3	444897	DEL	A4	.
	Pf3D7_02_v3	165748	Pf3D7_02_v3	165882	DEL	F12,A4	.
	Pf3D7_02_v3	248537	Pf3D7_02_v3	248846	DEL	3D7A	.
	Pf3D7_02_v3	481895	Pf3D7_02_v3	482331	DEL	F12	.
	Pf3D7_02_v3	568149	Pf3D7_02_v3	568332	DEL	A4	.
	Pf3D7_02_v3	702999	Pf3D7_02_v3	703030	DEL	F12	.
	Pf3D7_02_v3	716775	Pf3D7_02_v3	717140	DEL	3D7A	.
	Pf3D7_03_v3	470404	Pf3D7_03_v3	470502	DEL	3D7A	.
	Pf3D7_03_v3	485551	Pf3D7_03_v3	485837	DEL	3D7A	.
	Pf3D7_03_v3	559132	Pf3D7_03_v3	559631	DEL	3D7A	.
	Pf3D7_03_v3	616089	Pf3D7_03_v3	616195	DEL	A4	.
	Pf3D7_04_v3	205125	Pf3D7_04_v3	205498	DEL	3D7A,F12	.
	Pf3D7_04_v3	249763	Pf3D7_04_v3	249788	DEL	F12,A4,3D7A	PF3D7_0404600	conserved Plasmodium membrane protein, unknown function
	Pf3D7_04_v3	331004	Pf3D7_04_v3	331031	DEL	F12,A4,3D7A	.
	Pf3D7_04_v3	355657	Pf3D7_04_v3	355721	DEL	3D7A	PF3D7_0406900	conserved Plasmodium protein, unknown function
	Pf3D7_04_v3	371294	Pf3D7_04_v3	371453	DEL	3D7A	.
	Pf3D7_04_v3	375141	Pf3D7_04_v3	375214	DEL	F12,A4,3D7A	PF3D7_0407600	conserved Plasmodium protein, unknown function
	Pf3D7_04_v3	382973	Pf3D7_04_v3	383004	DEL	F12,A4,3D7A	PF3D7_0407700	conserved Plasmodium protein, unknown function
	Pf3D7_04_v3	1045165	Pf3D7_04_v3	1045247	DEL	F12	.
	Pf3D7_05_v3	291209	Pf3D7_05_v3	291524	DEL	F12	.
	Pf3D7_05_v3	301027	Pf3D7_05_v3	1116505	INV	3D7A	.
	Pf3D7_05_v3	364999	Pf3D7_05_v3	365259	DEL	3D7A	.
	Pf3D7_05_v3	626967	Pf3D7_05_v3	627259	DEL	F12	.
	Pf3D7_05_v3	626976	Pf3D7_05_v3	627273	DEL	A4	.
	Pf3D7_05_v3	694148	Pf3D7_05_v3	694274	DEL	3D7A	.
	Pf3D7_05_v3	707625	Pf3D7_05_v3	707693	DEL	A4	.
	Pf3D7_05_v3	707636	Pf3D7_05_v3	707701	DEL	F12	.
	Pf3D7_05_v3	976175	Pf3D7_05_v3	976427	DEL	3D7A	.
	Pf3D7_05_v3	1012439	Pf3D7_05_v3	1013092	INV	F12	.
	Pf3D7_05_v3	1100547	Pf3D7_05_v3	1100732	DEL	3D7A	.
	Pf3D7_06_v3	204491	Pf3D7_06_v3	204538	DEL	A4	.
	Pf3D7_06_v3	347303	Pf3D7_06_v3	347521	DEL	A4	PF3D7_0608300	conserved Plasmodium protein, unknown function
	Pf3D7_06_v3	553755	Pf3D7_06_v3	554099	DEL	A4	.
	Pf3D7_06_v3	643290	Pf3D7_06_v3	643584	DEL	F12	.
	Pf3D7_06_v3	643291	Pf3D7_06_v3	643578	DEL	3D7A	.
	Pf3D7_06_v3	676025	Pf3D7_06_v3	676516	DEL	A4	PF3D7_0616200	kinetochore protein NDC80, putative (NDC80)
	Pf3D7_06_v3	933271	Pf3D7_06_v3	933619	DEL	F12	.
	Pf3D7_06_v3	1203288	Pf3D7_06_v3	1203689	DEL	A4	.
	Pf3D7_06_v3	1270897	Pf3D7_06_v3	1271056	DEL	3D7A	.
	Pf3D7_07_v3	179282	Pf3D7_07_v3	179787	DEL	3D7A,F12	.
	Pf3D7_07_v3	242126	Pf3D7_07_v3	242360	DEL	F12	.
	Pf3D7_07_v3	402384	Pf3D7_07_v3	402675	DEL	F12	.
	Pf3D7_07_v3	482368	Pf3D7_07_v3	482673	DEL	3D7A	.
	Pf3D7_07_v3	625357	Pf3D7_07_v3	625611	DEL	F12	.
	Pf3D7_07_v3	687023	Pf3D7_07_v3	687364	DEL	3D7A	.
	Pf3D7_07_v3	1080142	Pf3D7_07_v3	1080334	DEL	F12	.
	Pf3D7_07_v3	1159553	Pf3D7_07_v3	1159601	DEL	3D7A	.
	Pf3D7_07_v3	1211000	Pf3D7_07_v3	1211168	DEL	3D7A	.
	Pf3D7_08_v3	79899	Pf3D7_08_v3	80738	INV	A4	PF3D7_0800800	Plasmodium exported protein (hyp7), unknown function
	Pf3D7_08_v3	227007	Pf3D7_08_v3	227386	DEL	3D7A	PF3D7_0803600	conserved Plasmodium protein, unknown function
	Pf3D7_08_v3	290550	Pf3D7_08_v3	290601	DEL	F12	.
	Pf3D7_08_v3	401417	Pf3D7_08_v3	401472	DEL	3D7A,A4	.
	Pf3D7_08_v3	604149	Pf3D7_08_v3	604497	DEL	3D7A,F12	.
	Pf3D7_08_v3	632636	Pf3D7_08_v3	632708	DEL	A4	.
	Pf3D7_08_v3	683952	Pf3D7_08_v3	684185	DEL	3D7A	.
	Pf3D7_09_v3	139106	Pf3D7_09_v3	139360	DEL	3D7A	.
	Pf3D7_09_v3	410761	Pf3D7_09_v3	411188	DEL	A4	PF3D7_0909000	conserved Plasmodium protein, unknown function
	Pf3D7_09_v3	546036	Pf3D7_09_v3	546269	DEL	A4	.
	Pf3D7_09_v3	619605	Pf3D7_09_v3	619896	DEL	A4	PF3D7_0914400	conserved Plasmodium protein, unknown function
	Pf3D7_09_v3	789036	Pf3D7_09_v3	789463	DEL	3D7A	.
	Pf3D7_09_v3	972254	Pf3D7_09_v3	972429	DEL	A4	.
	Pf3D7_09_v3	1106416	Pf3D7_09_v3	1106470	DEL	F12	.
	Pf3D7_09_v3	1121033	Pf3D7_09_v3	1121212	DEL	3D7A	PF3D7_0927500	dynein light chain, putative
	Pf3D7_09_v3	1148639	Pf3D7_09_v3	1149014	DEL	3D7A	.
	Pf3D7_09_v3	1257536	Pf3D7_09_v3	1257638	DEL	F12	.
	Pf3D7_09_v3	1402211	Pf3D7_09_v3	1402228	DEL	F12	.
	Pf3D7_10_v3	306301	Pf3D7_10_v3	306355	DEL	3D7A	.
	Pf3D7_10_v3	307317	Pf3D7_10_v3	307563	DEL	3D7A	.
	Pf3D7_10_v3	653234	Pf3D7_10_v3	653738	DEL	3D7A	PF3D7_1016300	glycophorin binding protein (GBP)
	Pf3D7_10_v3	782692	Pf3D7_10_v3	782801	DEL	3D7A	.
	Pf3D7_10_v3	1258960	Pf3D7_10_v3	1259004	DEL	F12	.
	Pf3D7_10_v3	1284560	Pf3D7_10_v3	1284971	DEL	A4	.
	Pf3D7_10_v3	1284563	Pf3D7_10_v3	1284973	DEL	F12	.
	Pf3D7_10_v3	1539216	Pf3D7_10_v3	1544813	DUP	3D7A	PF3D7_1038400	gametocyte-specific protein (Pf11-1)
	Pf3D7_10_v3	1542140	Pf3D7_10_v3	1543623	DEL	F12	PF3D7_1038400	gametocyte-specific protein (Pf11-1)
	Pf3D7_10_v3	1544272	Pf3D7_10_v3	1544303	DEL	A4	PF3D7_1038400	gametocyte-specific protein (Pf11-1)
	Pf3D7_10_v3	1544274	Pf3D7_10_v3	1544305	DEL	F12	PF3D7_1038400	gametocyte-specific protein (Pf11-1)
	Pf3D7_10_v3	1544614	Pf3D7_10_v3	1545477	DUP	3D7A	PF3D7_1038400	gametocyte-specific protein (Pf11-1)
	Pf3D7_10_v3	1545300	Pf3D7_10_v3	1545520	DEL	A4	PF3D7_1038400	gametocyte-specific protein (Pf11-1)
	Pf3D7_10_v3	1546182	Pf3D7_10_v3	1546267	DEL	F12,A4	PF3D7_1038400	gametocyte-specific protein (Pf11-1)
	Pf3D7_11_v3	354438	Pf3D7_11_v3	354894	DEL	A4	.
	Pf3D7_11_v3	367757	Pf3D7_11_v3	1422243	INV	F12	PF3D7_1108500	succinyl-CoA synthetase alpha subunit, putative
	Pf3D7_11_v3	389526	Pf3D7_11_v3	390249	DEL	3D7A	PF3D7_1109200	pre-mRNA splicing factor, putative
	Pf3D7_11_v3	536600	Pf3D7_11_v3	536853	DEL	A4	.
	Pf3D7_11_v3	536610	Pf3D7_11_v3	536861	DEL	F12	.
	Pf3D7_11_v3	677664	Pf3D7_11_v3	677996	DEL	3D7A	.
	Pf3D7_11_v3	908917	Pf3D7_11_v3	909151	DEL	A4	.
	Pf3D7_11_v3	908920	Pf3D7_11_v3	909151	DEL	3D7A,F12	.
	Pf3D7_11_v3	909053	Pf3D7_11_v3	909159	DEL	3D7A,F12	.
	Pf3D7_11_v3	1059787	Pf3D7_11_v3	1060033	DEL	F12	.
	Pf3D7_11_v3	1076520	Pf3D7_11_v3	1076884	DEL	3D7A	.
	Pf3D7_11_v3	1198706	Pf3D7_11_v3	1198752	DEL	A4	.
	Pf3D7_11_v3	1288517	Pf3D7_11_v3	1288955	DEL	A4	.
	Pf3D7_11_v3	1437252	Pf3D7_11_v3	1437828	INV	F12	.
	Pf3D7_11_v3	1599821	Pf3D7_11_v3	1600123	DEL	3D7A	.
	Pf3D7_12_v3	254320	Pf3D7_12_v3	254751	DEL	3D7A	.
	Pf3D7_12_v3	435027	Pf3D7_12_v3	435387	DEL	F12	.
	Pf3D7_12_v3	556175	Pf3D7_12_v3	556470	DEL	3D7A	PF3D7_1212600	conserved protein, unknown function
	Pf3D7_12_v3	573201	Pf3D7_12_v3	573584	DEL	3D7A	.
	Pf3D7_12_v3	635026	Pf3D7_12_v3	635511	DEL	F12	.
	Pf3D7_12_v3	973825	Pf3D7_12_v3	974241	DEL	F12,A4,3D7A	.
	Pf3D7_12_v3	1112942	Pf3D7_12_v3	1112969	DEL	3D7A	.
	Pf3D7_12_v3	1271140	Pf3D7_12_v3	1271580	DEL	3D7A	PF3D7_1231000	conserved Plasmodium protein, unknown function
	Pf3D7_12_v3	1566983	Pf3D7_12_v3	1567267	DEL	3D7A,F12	.
	Pf3D7_12_v3	1840977	Pf3D7_12_v3	1841200	DEL	F12	.
	Pf3D7_12_v3	1981690	Pf3D7_12_v3	1981733	DEL	3D7A	.
	Pf3D7_12_v3	2102285	Pf3D7_12_v3	2102657	DEL	3D7A	.
	Pf3D7_12_v3	2124603	Pf3D7_12_v3	2124632	DEL	A4	.
	Pf3D7_13_v3	412383	Pf3D7_13_v3	412535	DEL	3D7A	.
	Pf3D7_13_v3	585879	Pf3D7_13_v3	586473	INV	F12	.
	Pf3D7_13_v3	649777	Pf3D7_13_v3	649850	DEL	3D7A,A4	PF3D7_1315400	zinc finger (CCCH type) protein, putative
	Pf3D7_13_v3	996097	Pf3D7_13_v3	996386	DEL	3D7A	.
	Pf3D7_13_v3	1289690	Pf3D7_13_v3	1289944	DEL	3D7A	.
	Pf3D7_13_v3	1289692	Pf3D7_13_v3	1289943	DEL	F12	.
	Pf3D7_13_v3	1324847	Pf3D7_13_v3	1325052	DEL	F12	.
	Pf3D7_13_v3	1967232	Pf3D7_13_v3	1967651	DEL	A4	PF3D7_1349000	conserved Plasmodium protein, unknown function
	Pf3D7_13_v3	2003844	Pf3D7_13_v3	2004147	DEL	3D7A,F12	PF3D7_1350000	conserved Plasmodium protein, unknown function
	Pf3D7_13_v3	2003845	Pf3D7_13_v3	2004147	DEL	A4	PF3D7_1350000	conserved Plasmodium protein, unknown function
	Pf3D7_13_v3	2052958	Pf3D7_13_v3	2053465	DEL	A4	PF3D7_1351400	60S ribosomal protein L17, putative
	Pf3D7_13_v3	2502322	Pf3D7_13_v3	2502378	DEL	A4	.
	Pf3D7_13_v3	2561540	Pf3D7_13_v3	2562009	DEL	A4	.
	Pf3D7_13_v3	2561541	Pf3D7_13_v3	2562005	DEL	3D7A	.
	Pf3D7_14_v3	637701	Pf3D7_14_v3	637866	DEL	F12	.
	Pf3D7_14_v3	965857	Pf3D7_14_v3	966079	DEL	3D7A	.
	Pf3D7_14_v3	966877	Pf3D7_14_v3	967291	DEL	3D7A	.
	Pf3D7_14_v3	1015748	Pf3D7_14_v3	1015877	DEL	3D7A	.
	Pf3D7_14_v3	1040672	Pf3D7_14_v3	1041144	DEL	F12	.
	Pf3D7_14_v3	1107928	Pf3D7_14_v3	1108390	DEL	3D7A	.
	Pf3D7_14_v3	1281381	Pf3D7_14_v3	1281467	DEL	A4	PF3D7_1432400	leucine-rich repeat protein (LRR5)
	Pf3D7_14_v3	1607035	Pf3D7_14_v3	1607231	DEL	F12	.
	Pf3D7_14_v3	1695973	Pf3D7_14_v3	1696142	DEL	3D7A	.
	Pf3D7_14_v3	2087875	Pf3D7_14_v3	2088355	DEL	F12	.
	Pf3D7_14_v3	2103134	Pf3D7_14_v3	2103611	DEL	A4	.
	Pf3D7_14_v3	2258063	Pf3D7_14_v3	2258457	DEL	A4	.
	Pf3D7_14_v3	2339191	Pf3D7_14_v3	2339324	DEL	F12	.
	Pf3D7_14_v3	2473349	Pf3D7_14_v3	2473712	DEL	3D7A	.
	Pf3D7_14_v3	2883635	Pf3D7_08_v3	1373669	TRA	A4	PF3D7_1470500	phosphodiesterase delta, putative (PDEdelta)
	* Deletions (DEL), inversions (INV), Duplications (DUP)
